# Supplementary material
Source: MDPI journal article supplement (https://www.mdpi.com/2073-4344/12/9/942)
Supplement: s1 [file s1]

## *Supplementary Material*

### **Reactive Adsorption of MCM-41 Supported Sulfuric Acid for Anisole from Gaseous Stream**

**Dandan Zhao <sup>1</sup>, Jinjin Qian <sup>1</sup>, Yaxu Wang <sup>1</sup>, Zichuan Ma <sup>1,\*</sup> and Xiaolong Ma <sup>2,\*</sup>**

<sup>1</sup> Hebei Key Laboratory of Inorganic Nano-materials, College of Chemistry and Material Sciences, Hebei Normal University, Shijiazhuang 050024, China

<sup>2</sup> School of Environmental Science and Engineering, Hebei University of Science and Technology, Shijiazhuang 050018, China

\* Correspondence: mazc@hebtu.edu.cn (Z.M.); maxiaolong2410@hebust.edu.cn (X.M.);  
Tel: +86-0311-80787400 (Z.M.)

#### **Contents**

Figure S1. SEM images and EDS spectra of the spent SSA/MCM-41 before (a, b) and after (c, d) desorption.

Figure S2. FTIR spectrum of reactive adsorption product I.

Figure S3. FTIR spectrum of reactive adsorption product II.

Figure S4. <sup>1</sup>H NMR spectrum of reactive adsorption product I.

Figure S5. <sup>13</sup>C NMR spectrum of reactive adsorption product I.

Figure S6. <sup>1</sup>H NMR spectrum of reactive adsorption product II.

Figure S7. <sup>13</sup>C NMR spectrum of reactive adsorption product II.

Note: there were two adsorption products in the experiments. One was 4-methoxybenzenesulfonic acid (I), another was 1-methoxy-4-(4-methoxyphenyl)sulfonylbenzene (II).

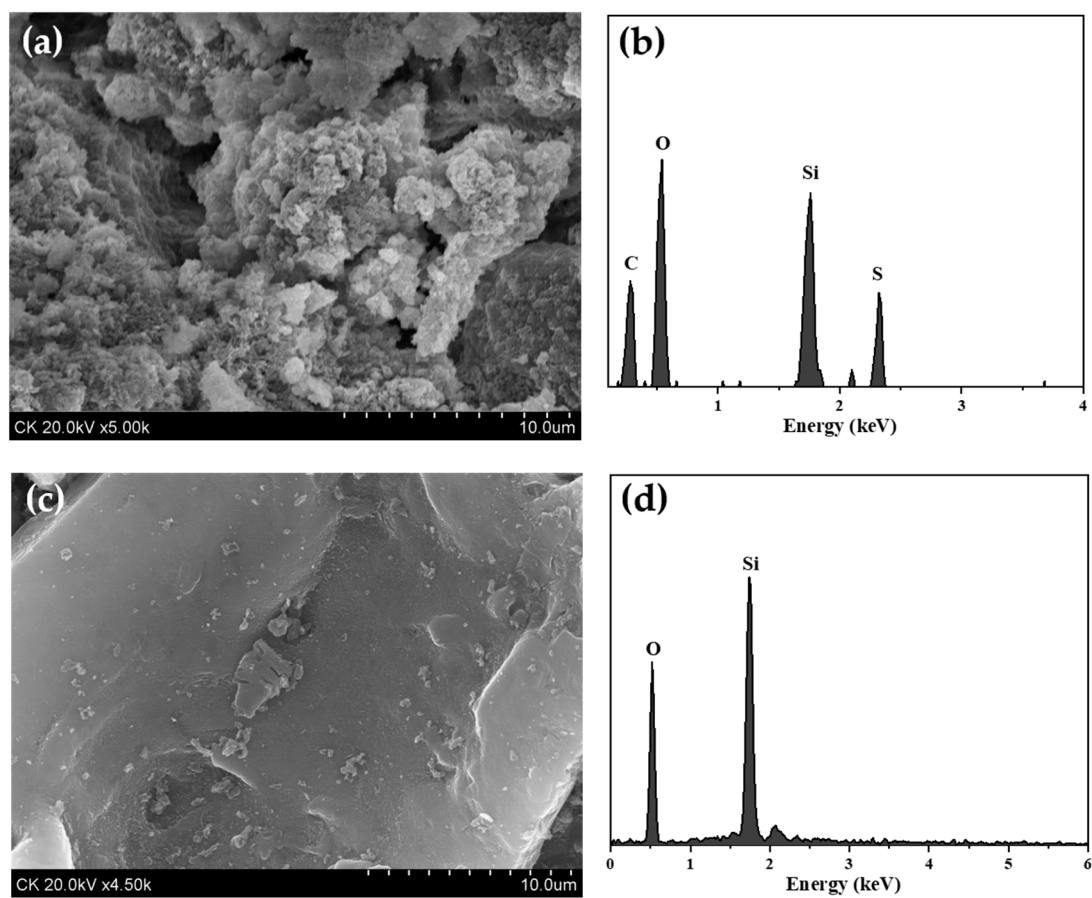

**Figure S1.** SEM images and EDS spectra of the spent SSA/MCM-41 before (a, b) and after (c, d) desorption.

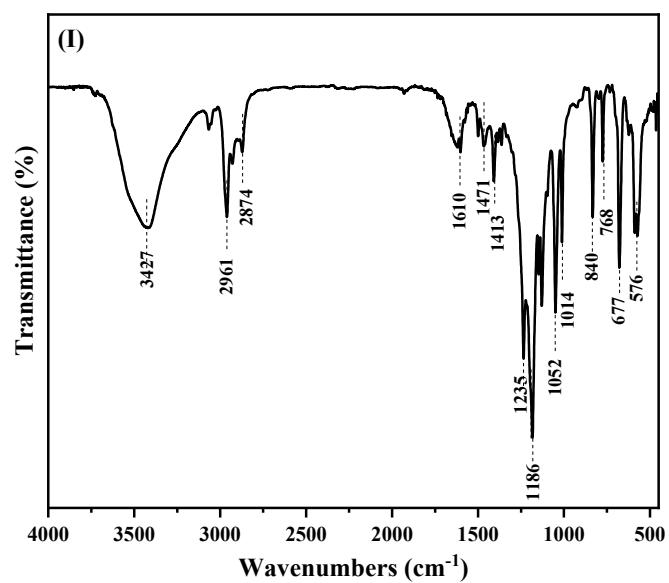

**Figure S2.** FTIR spectrum of the adsorption product I.

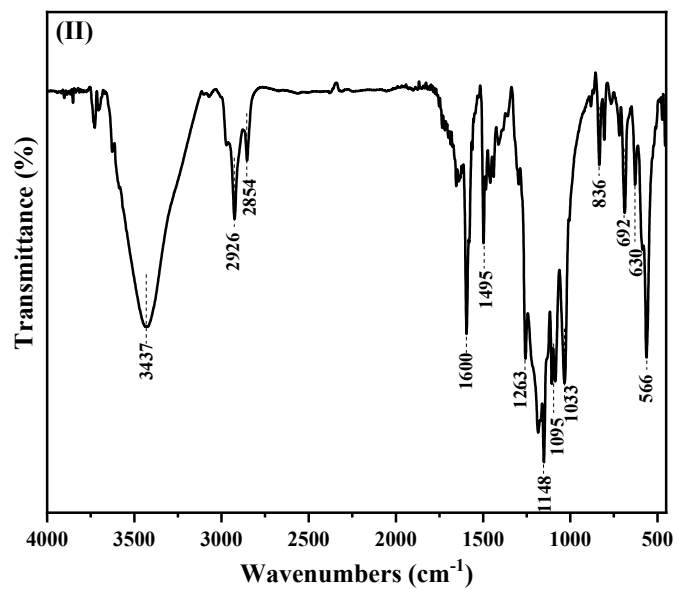

Figure S3. FTIR spectrum of the adsorption product II.

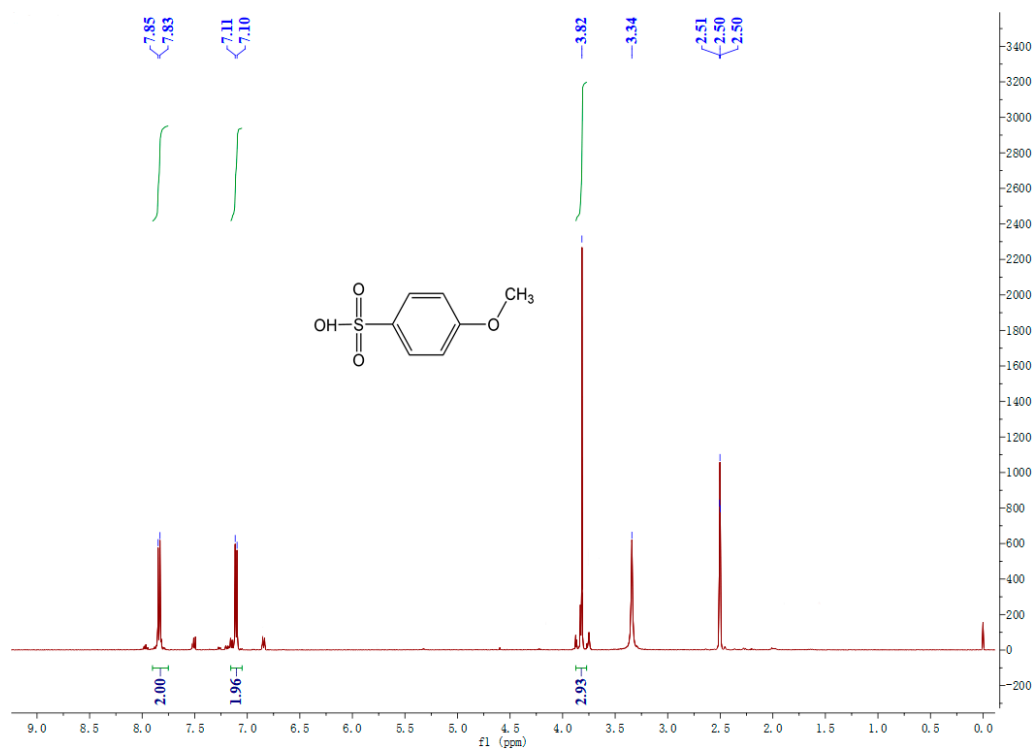

Figure S4. <sup>1</sup>H NMR spectrum of reactive adsorption product I.

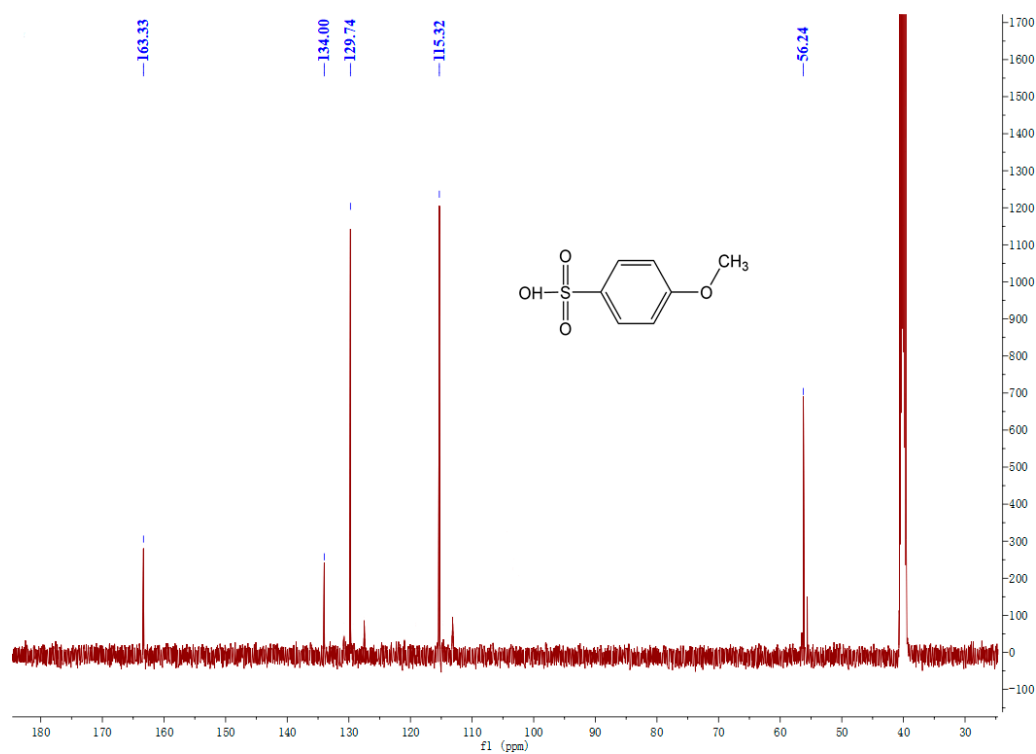

Figure S5. <sup>13</sup>C NMR spectrum of reactive adsorption product I.

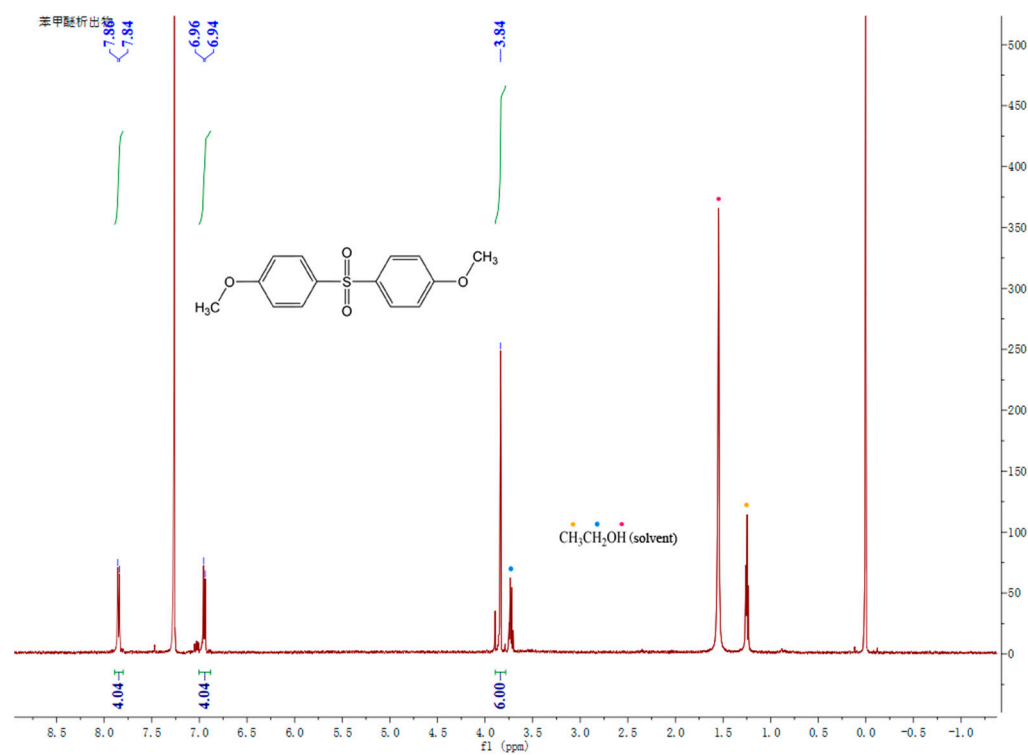

Figure S6. <sup>1</sup>H NMR spectrum of reactive adsorption product II.

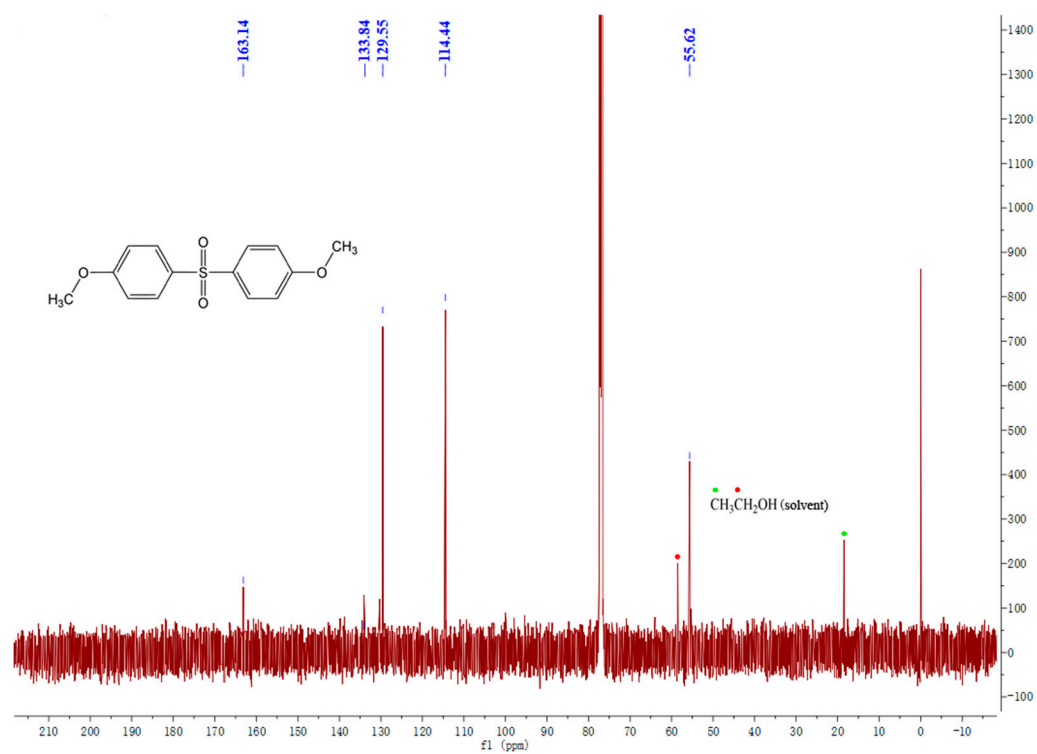

**Figure S7.**  $^{13}\text{C}$  NMR spectrum of reactive adsorption product II.
